# Supplementary material for: Comparative Effectiveness of Local Application of Chlorhexidine Gluconate, Mupirocin Ointment, and Normal Saline for the Prevention of Peritoneal Dialysis-related Infections (COSMO-PD Trial): a multicenter randomized, double-blind, controlled protocol
Source: Springer Nature journal article supplement (doi:10.1186/s13063-019-3953-8), 2019-12-01
Supplement: MOESM2 [file 23183776]

## **Supplementary Material**

### **Comparative Effectiveness of Local Application of Chlorhexidine Gluconate, Mupirocin Ointment, and Normal Saline for the Prevention of Peritoneal Dialysis-Related Infections (COSMO-PD): Protocol for a Multicenter Randomized Controlled Trial**

**Authors:** Surapon Nochaiwong (ORCID iD: [orcid.org/0000-0003-1100-7171](https://orcid.org/0000-0003-1100-7171)), Chidchanok Ruengorn (ORCID iD: [orcid.org/0000-0001-7927-1425](https://orcid.org/0000-0001-7927-1425)), Kajohnsak Noppakun, Setthapon Panyathong, Phongsak Dandecha, Manish M. Sood, Chalermpong Saenjums<sup>8</sup>, Ratanaporn Awiphan, Sasithorn Sirilun, Pajaree Mongkhon, Wilaiwan Chongruksut, Kednapa Thavorn; for the Thai Renal Outcomes Research (THOR) Investigators

#### **Correspondence:**

1) Surapon Nochaiwong, PharmD, Department of Pharmaceutical Care, Faculty of Pharmacy, Chiang Mai University, Chiang Mai 50200, Thailand, Phone: 66899973365, Fax: 6653222741, Email: [surapon.nochaiwong@gmail.com](mailto:surapon.nochaiwong@gmail.com)

**or**

2) Chidchanok Ruengorn, PhD, Department of Pharmaceutical Care, Faculty of Pharmacy, Chiang Mai University, Chiang Mai 50200, Thailand, Phone: 66810222932, Fax: 6653222741, Email: [chidchanok.r@elearning.cmu.ac.th](mailto:chidchanok.r@elearning.cmu.ac.th)

## Supplementary Online Content

|                    |                                                                     |    |
|--------------------|---------------------------------------------------------------------|----|
| <b>Appendix-I</b>  | Investigational medicinal products                                  | S3 |
| <b>Appendix-II</b> | Participants' information sheet and informed consent form (in Thai) | S8 |

**Appendix-I** Investigational medicinal products.

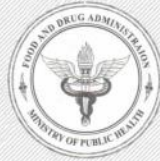

*Food and Drug Administration*

*Ministry of Public Health, Thailand*

**CERTIFICATE OF FREE SALE**

Ref.No. 1-1-03-02-15-00114

April 30, 2015

It is hereby certified that **Pose Health Care Limited, 1 Soi Ramintra 107, Ramintra Rd., Kannayao, Bangkok 10230, Thailand** does manufacture medical device in Thailand pursuant to the Medical Device Act 2008.

The following product may be sold in Thailand and exported without restriction.

Name of Product : **Ion PAD PLUS CHG2**

This certificate is issued upon the request of Pose Health Care Limited, Thailand.

Valid until 29 April 2017

(Mrs. Korrapat Trisarnsri)  
Senior Pharmacist

Acting Director of Medical Device Control Division  
For Secretary-General Food and Drug Administration

Division of Medical Device Control, Food and Drug Administration  
88/24 Tivanon Road, Nonthaburi 11000, Thailand  
Tel. (662) 590-7148, Fax. (662) 591-8445

# MATERIAL SAFETY DATA SHEET

## Ion PAD PLUS CHG 2

### 1- IDENTIFICATION

#### POSE HEALTH CARE LIMITED

1 SOI RAMINTRA 107 RAMINTRA RD.,  
KANNAYAO, BANGKOK 10230 THAILAND

Tel. 0-2917-8681-4 FAX.0-2917-8685

E-mail : [posehealthcare@hotmail.com](mailto:posehealthcare@hotmail.com)

[www.posehealthcare.com](http://www.posehealthcare.com)

### 2- COMPOSITION INFORMATION

|                                              | <u>%</u> | <u>CAS#</u> |
|----------------------------------------------|----------|-------------|
| Chlorhexidine Gluconate                      | 2.0      | 18472-51-0  |
| Other inert ingredients and DI. water qs. to | 100.0    |             |

### 3- PHYSICAL AND CHEMICAL PROPERTIES

**Boiling Point:** N/A

**Specific Gravity (H<sub>2</sub>O = 1):** N/A

**Vapor Pressure (mm Hg):** N/A

**Vapor Density (AIR = 1):** Heavier than water

**Evaporation Rate (Butyl Acetate = 1) :** Slower than ether

**Solubility in Water:** 100%

**Appearance and Odor :** Impregnated - Medical absorbent fabric

**pH :** 5.5 – 7.0

**Acute oral toxicity (LD50) of :** 13,929.97 mg/kg [Rat.].

### 4- FIRE AND EXPLOSION HAZARD DATA

**Flash Point (Method Used):** N/A

**Flammable Limits: LEL:** N/A **UEL:** N/A

**Extinguishing Media:** Carbon dioxide, dry chemical, foam

**Special Fire Fighting Procedures:** N/A

**Unusual Fire and Explosion Hazards:** N/A

30/07/57

1/2



## 5- REACTIVITY DATA

**Stability:** Stable

**Conditions to Avoid:** Avoid temperatures above 150°F.

**Incompatibility (Material to Avoid):** Strong oxidizing agents or acids

**Hazardous Decomposition Byproducts:** Oxides of carbon

**Hazardous Polymerization:** Not occur

## 6- HEALTH HAZARD DATA

**Routes of Entry:**

**Skin:** N/A

**Eyes:** Mild irritation

**Inhalation:** Low or mild irritation.

**Carcinogenicity - NTP:** No

**IARC Monographs:** No OSHA Regulated Carcinogen: No

## 7- EMERGENCY FIRST AID PROCEDURES

**Skin:** Wash skin with soap and water.

**Eyes:** Flush with water for 15 minutes. If irritation persists, seek medical attention

**Inhalation:** Remove to fresh air. If irritation persists, seek medical attention.

**Ingestion:** Do not induce vomiting. Give large amounts of water. Seek medical attention.

## 8- PRECAUTIONS FOR SAFE HANDLING & USE

**Steps to be done in case material is released or spilled:** Ventilate an area. Wipe up or rinse with tap water, sand or sweeping compound.

**Waste Disposal Method:** Dispose of in accordance with the state, And put in trash.

**Precautions to be taken in handling and storing:** Store product in original sealed container at room temperature.

**Other Precautions :** Keep out of reach of the children. Do not ingest. Avoid skin and eye contact. Avoid contamination of food.

## 9- CONTROL MEASURES

**Respiratory Protection :** Use in a well-ventilated area.

**VENTILATION:**

**Local Exhaust:** N/A

**Mechanical (General):** Should be sufficient.

**Protective Gloves:** Butyl rubber, nitrile rubber, polyethylene or double-gloved latex.

**Eyes Protection:** Safety glasses.

**Work/Hygiene Practices:** Handle in accordance with good personal hygiene and safety practices. These practices include avoiding unnecessary exposure.

## 10- TRANSPORTATION INFORMATION

Not regulated by DOT,IATA or IMO.

30/07/57

## Mupirocin Ointment: Concise Prescribing Info

### Manufacturer

Charoon Bhesaj

### Distributor

Charoon Bhesaj

### Mailing Address:

776/2-4 Ratchadapisek Rd.,  
Daokanong, Thonburi Bangkok 10600

### Contact Information:

Tel: (+66) 2477 3000

Fax: (+66) 2477 3001

Email: crb@crb.co.th

Website: <http://www.crb.co.th>

### Contents

Mupirocin

Indications / Uses: Treatment of various skin infections due to susceptible organisms eg, *Staph aureus*,  $\beta$ -hemolytic streptococcus, *S. pyogenes*.

Dosage / Direction for Use: Apply to the affected area tid for up to 10 days.

Contraindications: Hypersensitivity.

Side Effects / Adverse Reactions: Burning, stinging, itching.

### Preg Safety (US)

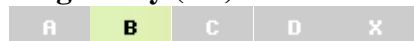

**Category B:** Either animal-reproduction studies have not demonstrated a foetal risk but there are no controlled studies in pregnant women or animal-reproduction studies have shown an adverse effect (other than a decrease in fertility) that was not confirmed in controlled studies in women in the 1<sup>st</sup> trimester (and there is no evidence of a risk in later trimesters).

### Topical Antibiotics

ATC Classification

D06AX09 - mupirocin ; Belongs to the class of other topical antibiotics used in the treatment of dermatological diseases.

### Thai FDA Category

E

### Presentation / Packing

Form

Packing/Price

Bacidal oint 2 % w/w

5 g x 12 x 1's

15 g x 12 x 1's

**License Number:** ๓๓.๒๒๘๔/๒๕๕๙

## **Sterile Irrigation Solutions: Concise Prescribing Info**

### **Manufacturer**

A.N.B. Laboratories Co., Ltd.

557 Ramintra Rd., Kannayao, Bangkok, Thailand 10230 / Tel: (+662) 5100021, 9431504-8 / Fax: (+662) 5109945, 5190421

### **Distributor**

Delfi Marketing

### **Contents**

Sodium chloride.

Indications / Uses: Wound irrigation, nasal irrigation, facial cleansing and contact lens rinsing.

Special Precautions: For Irrigation. Not for injection.

### **Preg Safety (US)**

|   |   |          |   |   |
|---|---|----------|---|---|
| A | B | <b>C</b> | D | X |
|---|---|----------|---|---|

Category C: Either studies in animals have revealed adverse effects on the foetus (teratogenic or embryocidal or other) and there are no controlled studies in women or studies in women and animals are not available. Drugs should be given only if the potential benefit justifies the potential risk to the foetus.

### **Caution For Usage**

Instruction for Use: 1. Unscrew the cap and discard the green plastic ring. 2. Screw in the cap tightly until the cone pin punctures through the inner cap and breaks the seal.

The cone pin will also reseal the opened bottle. Single use only. Discard unused portion.

Do not use if seal is damaged.

### **Storage**

Store below 30°C.

### **Description**

Each 100 mL contains: Sodium Chloride 0.9 g. Water for Injection q.s.

Sterile Isotonic Solution. No bacteriostatic present.

Intravenous & Other Sterile Solutions / Surgical Dressings & Wound Care / Nasal Decongestants & Other Nasal Preparations

### **ATC Classification**

V07AB - Solvents and diluting agents, incl. irrigating solutions; Used as solvents and diluting agents, including irrigating solutions.

### **Regulatory Classification**

NP

### **Presentation/ Packing**

Irrigation soln 0.9% x 100 mL, 500 mL, 1,000 mL.

## Appendix-II Participants' information sheet and informed consent form (in Thai).

### Participant Information Sheet

ข้อมูลสำหรับผู้ป่วยหรืออาสาสมัคร (อายุ 18 ปีขึ้นไป)

**ชื่อโครงการศึกษาวิจัย:** ประสิทธิภาพและความปลอดภัยของยาคลอเฮกซิดีนชนิดแผ่นผ้าเปรียบเทียบกับยาซึ่มมีพิโรซินในการป้องกันการติดเชื้อที่สัมพันธ์กับการล้างไตทางช่องท้อง: การศึกษาทดลองเปรียบเทียบกลุ่มควบคุมแบบสุ่มแบ่งชั้น ชนิดปกปิด 2 ทาง

**หมายเลขโครงการศึกษาวิจัย:** NCD58007P3

**ผู้ให้ทุนสนับสนุนการวิจัย:** สถาบันวิจัยระบบสาธารณสุข (สวรส.) ภายใต้เครือข่ายองค์กรบริหารงานวิจัยแห่งชาติ (คอบช.)

**ผู้วิจัย:** อาจารย์ เกษักร สุรพล โนชัยวงศ์

ท่านได้รับการเชิญให้เข้าร่วมการศึกษานี้ เนื่องจากท่านเป็นผู้ป่วยที่ได้รับการบำบัดทดแทนไตด้วยการล้างไตทางช่องท้อง ท่านกรุณาอ่านข้อมูลข้างล่างก่อน (หรือผู้วิจัยได้อ่านให้ท่านรับทราบ) หากท่านมีข้อสงสัยใดๆ เกี่ยวกับการศึกษานี้และสิทธิของท่าน กรุณาซักถามจากแพทย์ผู้ทำการศึกษานี้ หรือ ผู้ช่วยแพทย์ที่ทำการศึกษานี้ ซึ่งจะเป็นผู้สามารถให้ความกระจ่างแก่ท่านได้ หากท่านตัดสินใจเข้าร่วมการศึกษานี้ ท่านจะได้รับเอกสารข้อมูลสำหรับผู้เข้าร่วมโครงการวิจัยและสำเนาใบยินยอมที่ท่านเซ็นชื่อกำกับไว้ 1 ฉบับ

#### การศึกษานี้เกี่ยวกับเรื่องอะไร

แผ่นผ้าที่มีตัวยาเคลือบชื่อ “คลอเฮกซิดีน กลูโคเนต” และยาซึ่มมีพิโรซิน ได้ถูกพัฒนาขึ้นเพื่อใช้ในการป้องกันและลดโอกาสในการติดเชื้อแบคทีเรีย และพบว่าอาจสามารถใช้ป้องกันการติดเชื้อที่สัมพันธ์กับการล้างไตทางช่องท้องได้ ซึ่งเป็นภาวะแทรกซ้อนชนิดหนึ่งที่เกิดขึ้นได้บ่อยในผู้ป่วยที่ได้รับการล้างไตทางช่องท้อง ทางผู้วิจัยจึงต้องการศึกษาว่ายาคลอเฮกซิดีนชนิดแผ่นผ้า และ ยาซึ่มมีพิโรซิน จะสามารถใช้ป้องกันการติดเชื้อที่สัมพันธ์กับการล้างไตทางช่องท้องได้หรือไม่ โดยเปรียบเทียบกับการรักษาตามมาตรฐาน คือ การใช้สารละลายน้ำเกลือนอร์มัล และเทคนิคปลอดเชื้อในการดูแลช่องสายออก การศึกษานี้จะรวบรวมผู้ป่วยประมาณ 267 ราย จาก 3 โรงพยาบาล คือ โรงพยาบาลนครพิงค์ จังหวัดเชียงใหม่ โรงพยาบาลมหาราชนครเชียงใหม่ มหาวิทยาลัยเชียงใหม่ และโรงพยาบาลสงขลานครินทร์ มหาวิทยาลัยสงขลานครินทร์

#### ท่านต้องปฏิบัติตัวอย่างไร

หากท่านตัดสินใจเข้าร่วมการศึกษานี้ท่านจะถูกขอร้องให้เซ็นชื่อลงในใบยินยอม ท่านจะได้รับการตรวจร่างกาย และท่านจะต้องแจ้งให้แพทย์ของท่านทราบว่าในระยะเวลา 2 สัปดาห์ที่ผ่านมา ท่านได้รับยาอะไรบ้าง หรือกำลังรับยาใดอยู่ ก่อนเริ่มเข้าสู่การศึกษา ท่านจะได้รับการเจาะเลือด เพื่อตรวจทางห้องปฏิบัติการพื้นฐานที่จำเป็น นอกจากนี้ท่านและผู้ดูแลท่าน (ผู้ช่วยในการเปลี่ยนถ่ายน้ำยาล้างไต) จะได้รับการตรวจวัดปริมาณเชื้อแบคทีเรียที่บริเวณโพรงงูมและรอบทางออกสาย เพื่อใช้ประเมินความเสี่ยงในการติดเชื้อแบคทีเรียที่สัมพันธ์กับการล้างไตทางช่องท้องในอนาคต ทั้งนี้ท่านจะสามารถเริ่มได้รับยาคลอเฮกซิดีนชนิดแผ่นผ้า ยาซึ่มมีพิโรซิน หรือการรักษาตามมาตรฐาน ก็ต่อเมื่อผลการตรวจ/สัมภาษณ์ยืนยันว่าท่านเหมาะสมที่จะเข้าร่วมการศึกษานี้

เมื่อท่านยินดีเข้าร่วมการศึกษานี้ ท่านอาจจะได้รับมาตรการดังต่อไปนี้

1) ยาคลอเฮกซิดีนชนิดแผ่นผ้า เช็ดทำความสะอาดรอบทางออกสายวันละครั้ง ร่วมกับซึ่มมีพิโรซินที่ไม่มีตัวยา และสารละลายน้ำเกลือนอร์มัล ในการทำความสะอาดทางออกสาย

หรือ 2) ยาซึ่มมีพิโรซิน ป้ายรอบทางออกสายวันละครั้ง ร่วมกับแผ่นผ้าห่อหุ้มที่ไม่มีตัวยา และสารละลายน้ำเกลือนอร์มัล ในการทำความสะอาดทางออกสาย

หรือ 3) การรักษาตามมาตรฐาน คือ สารละลายน้ำเกลือนอร์มัล เช็ดทำความสะอาดรอบทางออกสายวันละครั้ง ร่วมกับแผ่นผ้าห่อหุ้มที่ไม่มีตัวยา และซึ่มมีพิโรซินที่ไม่มีตัวยา ในการทำความสะอาดทางออกสาย



โดยท่านจะได้รับยาคลอเฮกซิดีนชนิดแผ่นผ้า ยาซีฟิงมิวพิโรซิน หรือการรักษามาตรฐาน ในจำนวนเพียงพอจนกว่าท่านจะมาพบแพทย์ครั้งต่อไป ท่านจะได้รับการประเมินความร่วมมือในการใช้ยา ทั้งในระหว่างที่มาตรวจรับบริการทางการแพทย์ และการสัมภาษณ์ทางโทรศัพท์ ตลอดระยะเวลาที่เข้าร่วมโครงการ นอกจากนี้ท่านจะต้องนำของยาทุกซอง และผลิตภัณฑ์ที่เหลือ (แผ่นผ้า และยาซีฟิง) มาด้วยทุกครั้งที่มาพบแพทย์ เพื่อประเมินความร่วมมือในการใช้ยา

ในระหว่าง 1 เดือนแรกที่เริ่มเข้าสู่โครงการ ท่านจะได้รับการติดต่อทางโทรศัพท์จากผู้วิจัยทุกสัปดาห์ รวมทั้งสิ้นจำนวน 4 ครั้ง และในกรณีที่จำเป็นท่านอาจได้รับการติดต่อทางโทรศัพท์เพิ่มเติมภายหลัง ระยะเวลาทั้งหมดที่ใช้ในการศึกษา คือ 24 เดือน นับแต่ที่ท่านได้รับยาที่ใช้ในการศึกษา โดยท่านจะต้องมาพบแพทย์รวมทั้งสิ้น 8 ครั้ง ตลอดระยะเวลาที่เข้าร่วมการศึกษา แต่ละครั้งที่ท่านมาพบแพทย์ท่านจะได้รับการเจาะเลือด ประมาณ 10 มิลลิลิตร คิดเป็นปริมาตรทั้งสิ้นประมาณ 40 มิลลิลิตร (ประมาณครึ่งถ้วยตวง) นอกจากนี้ท่านจะถูกซักถามเกี่ยวกับความร่วมมือในการใช้ยา พร้อมกันนั้นแพทย์จะตรวจสอบสุขภาพโดยทั่วไปของท่านด้วย และในกรณีที่จำเป็นท่านอาจถูกเก็บตัวอย่างอื่นๆ เพิ่มเติม เช่น การส่งตรวจน้ำยาล้างไต หรือหนอง/สารคัดหลั่งรอบทางออกสาย เพื่อยืนยันการวินิจฉัยโรคในกรณีที่สงสัยการติดเชื้อที่สัมพันธ์กับการล้างไตทางช่องท้อง

ท่านไม่ควรจะรับประทานยาหรือใช้ยาอื่นร่วมด้วย หากแพทย์ของท่านไม่เห็นด้วย แต่หากมีเหตุจำเป็นท่านต้องแจ้งให้แพทย์ของท่านทราบ หากท่านสัมผัสรับประทานยาหรือใช้ยาไม่ว่าด้วยเหตุผลใด หรือท่านรู้สึกไม่สบาย หรือ รู้สึกแตกต่างจากการมาพบแพทย์ครั้งก่อน ขอให้ท่านแจ้งต่อแพทย์ของท่านด้วย

หากท่านไปพบแพทย์ท่านอื่นเพื่อรับการรักษา ขอให้ท่านแจ้งต่อแพทย์ท่านนั้นด้วยว่าท่านกำลังร่วมการศึกษาวินิจฉัยอยู่ ท่านจะได้รับบัตรที่บ่งบอกถึงการศึกษาวินิจฉัยนี้ และท่านควรจะพกบัตรนี้ติดตัวตลอดเวลาเพื่อที่จะแสดงต่อพยาบาล หรือแพทย์ท่านอื่น

### **ความเสี่ยงจากการเข้าร่วมการวิจัยนี้**

#### **ผลข้างเคียงจากยา**

ปัจจุบันมีการใช้ยาซีฟิงมิวพิโรซิน หรือสารละลายน้ำเกลืออนอร์มัล ในผู้ป่วยที่ได้รับการล้างไตทางช่องท้องอยู่แล้ว ในขณะที่ยาคลอเฮกซิดีน แม้จะยังไม่มีการใช้ในผู้ป่วยที่ได้รับการล้างไตทางช่องท้องอย่างแพร่หลาย แต่ก็มีกรนำมาใช้ในผู้ป่วยที่เข้ารับการรักษาตัวในโรงพยาบาลเพื่อป้องกันการติดเชื้อแบคทีเรีย โดยทั่วไปผู้ป่วยสามารถทนต่อยาทั้ง 3 ชนิดข้างต้นได้ดี ผลข้างเคียงส่วนใหญ่ไม่รุนแรง และเกิดกับระบบผิวหนังเป็นหลัก เช่น ระคายเคือง ผื่นผิวหนัง หรืออาการแพ้ทางผิวหนัง มีส่วนน้อยที่เกิดอาการรุนแรง คือ ภาวะฉุกเฉินที่เกิดจากปฏิกิริยาภูมิแพ้อย่างเฉียบพลัน หรือการระคายเคืองอย่างรุนแรง ซึ่งมักเกิดในกรณีที่สัมผัสกับตัวยาในความเข้มข้นสูงโดยตรง

#### **ความเสี่ยงจากการเจาะเลือด**

ท่านอาจรู้สึกหน้ามืด เป็นลม ปวดบริเวณที่เจาะ หรือมีจ้ำเลือดบริเวณที่เจาะ มีความเสี่ยงน้อยมากที่จะเกิดการติดเชื้อจากการเจาะเลือด เพราะเข็มที่ใช้นั้น ปราศจากเชื้อและใช้ครั้งเดียวทิ้ง

### **ท่านจะได้ประโยชน์อะไรจากการศึกษานี้**

ท่านอาจสามารถลดความเสี่ยงในการเกิดภาวะแทรกซ้อนจากการล้างไตทางช่องท้อง คือ การติดเชื้อที่สัมพันธ์กับการล้างไตทางช่อง และเพิ่มความสำเร็จในการรักษาด้วยการล้างไตทางช่องท้อง นอกจากนี้ผลสรุปที่ได้จากการศึกษานี้จะเป็นประโยชน์ต่อผู้ป่วยรายอื่นในอนาคต

#### **ค่าใช้จ่ายในการเข้าร่วมวิจัย**

ทางคณะผู้วิจัย จะเป็นผู้ออกค่าใช้จ่ายในส่วนที่เกี่ยวข้องกับยาที่ใช้ในการศึกษาวินิจฉัย และค่าเดินทาง/ค่าเสียโอกาสที่เกิดขึ้นในการมาตรวจรับบริการ ส่วนค่าตรวจทางห้องปฏิบัติการอื่นที่เกี่ยวข้อง เป็นค่าใช้จ่ายที่เกิดขึ้นจากขั้นตอนการรักษาปกติ ท่านจะต้องเป็นผู้รับผิดชอบ ในกรณีที่ท่านมีสิทธิเบิกค่ารักษา กรุณาสอบถามสิทธิของท่านจากแพทย์ผู้วิจัย

#### **ค่าตอบแทน**

ท่านจะได้รับค่าเดินทาง/ค่าเสียโอกาส จากการเข้าร่วมการศึกษาวินิจฉัยนี้ เหน่าจ่าย 500 บาท/ครั้ง ที่ท่านมาพบแพทย์ คิดเป็น 4,000 บาท ตลอดระยะเวลาที่เข้าร่วมโครงการ 24 เดือน

## หากท่านได้รับบาดเจ็บจากการเข้าร่วมการศึกษาวิจัย

หากท่านได้ปฏิบัติตามคำแนะนำของแพทย์ผู้วิจัยแล้ว และยาที่ใช้ในการศึกษาวิจัยหรือกระบวนการต่าง ๆ ในการวิจัยทำให้ท่านได้รับบาดเจ็บ แพทย์ผู้รักษาจะดำเนินการรักษาพยาบาลให้แก่ท่านตามแนวทางการรักษามาตรฐาน ตามสิทธิผู้ป่วยที่ท่านพึงมี

## ทางเลือกอื่นในการป้องกันการติดเชื้อที่สัมพันธ์กับการล้างไตทางช่องท้อง

ท่านไม่จำเป็นต้องเข้าร่วมการศึกษาวิจัยเพื่อให้ได้รับมาตรการในการป้องกันการติดเชื้อที่สัมพันธ์กับการล้างไตทางช่องท้อง ปัจจุบันแม้ยังไม่มีมาตรฐานที่ใช้ในการป้องกันการติดเชื้อที่สัมพันธ์กับการล้างไตทางช่องท้อง แต่แนวทางการรักษาปกติของของโรงพยาบาลที่ท่านใช้บริการอยู่ เช่น เทคนิคปลอดเชื้อในการดูแลทางออกสาย หรือการส่งเสริมภาวะโภชนาการที่เหมาะสม ก็สามารถป้องกันการติดเชื้อที่สัมพันธ์กับการล้างไตทางช่องท้องได้ดีในระดับหนึ่ง

## ท่านจะอย่างไรหากท่านไม่ต้องการเข้าร่วมการศึกษาวิจัย หรือเปลี่ยนใจระหว่างร่วมศึกษาวิจัย

ท่านไม่จำเป็นต้องเข้าร่วมการศึกษาวิจัยนี้หากท่านไม่สมัครใจ หลังจากท่านตัดสินใจจะเข้าร่วมการศึกษาแล้ว ท่านสามารถจะถอนตัวได้ตลอดเวลา การตัดสินใจของท่านจะไม่มีผลต่อการรักษาในอนาคต หรือการดูแลอื่นใด หากท่านไม่ต้องการเข้าร่วมการศึกษาหรือต้องการหยุดการศึกษา ณ เวลาใดก็ตาม

ในกรณีที่มีแนวทางการป้องกันการติดเชื้อที่สัมพันธ์กับการล้างไตทางช่องท้องที่มีประสิทธิภาพดีกว่า คณะผู้วิจัยอาจจะตัดสินใจแยกท่านจากการศึกษา หากเห็นว่าจะจะเป็นประโยชน์สำหรับท่านมากกว่า

## ใครจะรู้บ้างว่าท่านเข้าร่วมการศึกษานี้

แพทย์ประจำตัวท่าน (แพทย์เวชปฏิบัติทั่วไป) ควรจะได้รับทราบว่าคุณตัดสินใจเข้าร่วมการศึกษานี้ ข้อมูลของท่านที่ถูกบันทึกไว้ระหว่างการศึกษานี้ เช่นเดียวกับข้อมูลที่เกี่ยวข้องจากแฟ้มเวชระเบียนของโรงพยาบาล คลินิก หรือข้อมูลอื่น ๆ จะถูกเก็บไว้เป็นความลับตลอดเวลา คณะกรรมการจริยธรรมการวิจัย และคณะผู้วิจัยหรือผู้แทนที่คณะผู้วิจัยได้จัดตั้งขึ้น สามารถที่จะขอตรวจสอบข้อมูลเหล่านี้ได้ โดยข้อมูลเหล่านี้จะยังเก็บรักษาไว้เป็นเรื่องลับเฉพาะ

## การปกป้องรักษาข้อมูล: ข้อมูลใดบ้างที่จะถูกเก็บรวบรวมไว้จากการศึกษานี้

ข้อมูลส่วนตัวที่ท่านไม่ต้องการเปิดเผยจะถูกเก็บรวบรวมไว้และนำมาใช้เพื่อวัตถุประสงค์ทางการวิจัยทางการแพทย์ เฉพาะในส่วนที่เกี่ยวข้องกับการศึกษา ข้อมูลดังกล่าวจะถูกสรุปผลในภาพรวม โดยจะไม่มีการอ้างถึงชื่อท่านในรายงานหรือวารสารใด ๆ

หากท่านตกลงใจเข้าร่วมการศึกษา ท่านยินยอมที่จะไม่จำกัดการให้ข้อมูลที่เป็นส่วนตัว ยกเว้นในกรณีที่ขัดต่อสิทธิส่วนบุคคลภายใต้ (ก) ข้อบังคับแพทยสภาว่าด้วยการรักษาจริยธรรมแห่งวิชาชีพเวชกรรม พ.ศ. 2549 หมวด 9 การศึกษาวิจัยและการทดลองในมนุษย์ และ (ข) สิทธิผู้ป่วยของ แพทยสภา, สภากาชาด, พันธแพทย์สภา บุคคลอื่นในนามของคณะผู้วิจัยอาจจะได้รับอนุญาตให้เข้ามาตรวจสอบและประมวลผลข้อมูลส่วนตัวของท่าน ทั้งนี้จะต้องกระทำไปตามคำบอกกล่าวของคณะผู้วิจัย และเพื่อวัตถุประสงค์ทางการศึกษาวิจัยทางการแพทย์เท่านั้น โดยคณะผู้วิจัยจะทำทุกวิถีทางเพื่อให้เกิดความมั่นใจว่าข้อมูลส่วนตัวของท่านจะถูกปกป้องไว้

## หากสิ้นสุดการศึกษาแล้วยาที่ใช้ในการศึกษาจะมีให้ท่านหรือไม่

ภายหลังสิ้นสุดการศึกษา แพทย์ของท่านจะพิจารณาตามแนวทางปกติของแต่ละสถาบัน/โรงพยาบาล ในการป้องกันการติดเชื้อที่สัมพันธ์กับการล้างไตทางช่องท้อง ซึ่งอาจทำให้ท่านได้รับยาฆ่าเชื้อที่มีฤทธิ์ หรือสารละลายน้ำเกลืออินทรีย์ และเทคนิคปลอดเชื้อในการดูแลทางออกสาย ในกรณียากลอบเอ็กซิทีนชนิดแผ่นผ้านั้น หากพบว่ามีประสิทธิภาพ ความปลอดภัย และความคุ้มค่าในการใช้ ผู้วิจัยจะขยายผลโดยการเผยแพร่และส่งเสริมมาตรการดังกล่าวนี้ เพื่อให้เกิดการใช้กันอย่างแพร่หลายต่อไป

## หากท่านมีคำถามเกี่ยวกับการศึกษานี้ท่านสามารถติดต่อใครได้บ้าง

หากท่านมีคำถามหรือมีความวิตกกังวลเกี่ยวกับการศึกษาวิจัยนี้ หรือสงสัยว่าท่านกำลังได้รับบาดเจ็บจากการเข้าร่วมการวิจัยนี้ กรุณาติดต่อ เกษักร สุรพล โนชัยวงศ์ เบอร์โทรศัพท์ 053-944-334 (ในเวลาราชการ) โทรศัพท์เคลื่อนที่ 089-9973365 (ทั้งในและนอกเวลาราชการ) หรือติดต่อที่ ภาควิชาบริหารเภสัชกรรม คณะเภสัชศาสตร์ มหาวิทยาลัยเชียงใหม่ ถ.สุเทพ ต.สุเทพ อ.เมือง จ.เชียงใหม่ 50200 โทรศัพท์ 0-5394-4334 (ในเวลาราชการ) โทรสาร 0-5322-2741 (ในเวลาราชการ)

## INFORMED CONSENT FORM

### หนังสือแสดงความยินยอมการเข้าร่วมในโครงการวิจัย สำหรับอาสาสมัคร อายุ 18 ปีขึ้นไป

ข้าพเจ้า นาย/นาง/นางสาว ..... ขอให้ความยินยอมของตนเองที่จะเข้าร่วมในการศึกษาวิจัยเรื่อง “ประสิทธิผลและความปลอดภัยของยาโคลอเฮกซิดีนชนิดแผ่นผ้าเปรียบเทียบกับยาซีฟิ่งมิวพิโรซินในการป้องกันการติดเชื้อที่สัมพันธ์กับการล้างไตทางช่องท้อง: การศึกษาทดลองเปรียบเทียบกลุ่มควบคุมแบบสุ่มแบ่งชั้น ชนิดปกปิด 2 ทาง”

ข้าพเจ้าได้รับข้อมูลและคำอธิบายเกี่ยวกับการวิจัยนี้แล้ว ข้าพเจ้าได้มีโอกาสซักถามเกี่ยวกับการวิจัยนี้และได้รับคำตอบเป็นที่พอใจแล้ว ข้าพเจ้ามีเวลาเพียงพอในการอ่านและทำความเข้าใจกับข้อมูลในเอกสารนี้อย่างถี่ถ้วน และได้รับเวลาเพียงพอในการตัดสินใจว่าจะเข้าร่วมการศึกษาวิจัยนี้หรือไม่ ผู้วิจัยมีความยินดีที่จะให้คำตอบต่อคำถามประการใดที่ข้าพเจ้าอาจจะมีได้ ตลอดระยะเวลาการเข้าร่วมการวิจัยครั้งนี้ ผู้วิจัยรับรองว่าจะเก็บข้อมูลเฉพาะที่เกี่ยวกับตัวข้าพเจ้าเป็นความลับ และจะเปิดเผยได้เฉพาะในรูปที่เป็นสรุปผลการวิจัย และผู้วิจัยจะปฏิบัติตามสิ่งที่ไม่ก่อให้เกิดอันตรายต่อร่างกาย หรือจิตใจของข้าพเจ้าตลอดการวิจัยนี้ และรับรองว่าหากเกิดมีอันตรายใดๆ จากการวิจัยดังกล่าว ผู้ยินยอมจะได้รับการรักษาอย่างเต็มที่

ข้าพเจ้ายินยอมเข้าร่วมการวิจัยโดยสมัครใจ และสามารถที่จะถอนตัวจากการวิจัยนี้เมื่อใดก็ได้ ทั้งนี้ โดยไม่มีผลกระทบต่อการรักษาพยาบาลที่ข้าพเจ้าจะได้รับถ้าหากข้าพเจ้าเป็นผู้ป่วย และในกรณีที่เกิดข้อข้องใจหรือปัญหาที่ข้าพเจ้าต้องการปรึกษากับผู้วิจัย ข้าพเจ้าสามารถติดต่อกับผู้วิจัย คือ อาจารย์ เกษชกร สุรพล โนชัยวงศ์ ได้ที่ ภาควิชาบริหารเภสัชกรรม คณะเภสัชศาสตร์ มหาวิทยาลัยเชียงใหม่ ถ.สุเทพ ต.สุเทพ อ.เมือง จ.เชียงใหม่ 50200 โทรศัพท์ที่ทำงาน 053-944-334 โทรศัพท์เคลื่อนที่ 089-997-3365 โทรสาร 053-222-741

โดยการลงนามนี้ ข้าพเจ้าไม่ได้สละสิทธิ์ใดๆ ที่ข้าพเจ้าพึงมีตามกฎหมาย

ลายมือชื่ออาสาสมัคร \_\_\_\_\_  
( \_\_\_\_\_ )

วัน-เดือน-ปี \_\_\_\_\_

ลายมือชื่อผู้ดูแล/ญาติ \_\_\_\_\_  
( \_\_\_\_\_ )

วัน-เดือน-ปี \_\_\_\_\_

ลายมือชื่อผู้ให้ข้อมูลการวิจัย \_\_\_\_\_  
( \_\_\_\_\_ )

วัน-เดือน-ปี \_\_\_\_\_

พยาน \_\_\_\_\_  
( \_\_\_\_\_ )

วัน-เดือน-ปี \_\_\_\_\_
